# Supplementary material
Source: PubMed Central journal article supplement (PMC5079244)
Supplement: PRO-25-2066-s001.pdf [file PRO-25-2066-s001.pdf]

**Suppl. Table SI. Sequences and AutoMatch scores of Tbab1 proteins.** The mutation sites suggested by AutoMatch are colored in red.

|                | Sequence                                                          | Interaction Score | Conformat-ion Score | Combined score |
|----------------|-------------------------------------------------------------------|-------------------|---------------------|----------------|
| <b>DS119</b>   | GSG QVRTIWV GG TPEELKKLKEEAKKA NIRVTFWGD                          |                   |                     |                |
| <b>Tbab1-1</b> | GSG QVRTIWV GG TPEEL <b>E</b> KLKEEAK <b>MY</b> NIRVTFWGD         | -24.1             | 4.5                 | -23.0          |
| <b>Tbab1-2</b> | GSG QVRTIWV <b>GE</b> TPEEL <b>MYL</b> KKEEAKKA NIRVTFWGD         | -23.74            | 4.3                 | -22.6          |
| <b>Tbab1-3</b> | GSG QVRTIWV GG TPEELKKL <b>KY</b> EAMKA NIE <b>V</b> TFWGD        | -23.6             | 4.5                 | -22.5          |
| <b>Tbab1-4</b> | GSG QVRTIWV GG <b>YPEML</b> KKLKEEAKKA NIRVTFWGD                  | -21.3             | 4.2                 | -20.2          |
| <b>Tbab1-5</b> | GSG QVRTIWV GG TPEEL <b>MYL</b> KKEEAKKA NIRVTF <b>WED</b>        | -22.0             | 7.3                 | -20.2          |
| <b>Tbab1-6</b> | GSG QVRTIWV GG TPEEL <b>YKL</b> MEEAKKA NIE <b>V</b> TFWGD        | -20.6             | 4.2                 | -19.5          |
| <b>Tbab1-7</b> | GSG QVRTIWV <b>GY</b> <b>TMEEL</b> KKL <b>KEE</b> AKKA NIRVTFWGD  | -20.4             | 8.9                 | -19.2          |
| <b>Tbab1-8</b> | GSG QVRTIWV GG TPEELKKL <b>KY</b> EAK <b>MA</b> <b>E</b> IRVTFWGD | -20.0             | 5.8                 | -18.9          |
| <b>Tbab1-9</b> | GSG QVRTIWV <b>GY</b> <b>MPEEL</b> EKLKEEAKKA NIRVTFWGD           | -20.2             | 5.1                 | -18.7          |

**Suppl. Table SII. TNF $\alpha$ -Tbab interaction rate constants measured by SPR.**

|         | $k_{on}$ ( $M^{-1}s^{-1}$ )             | $k_{off}$ ( $s^{-1}$ )                        |
|---------|-----------------------------------------|-----------------------------------------------|
| Tbab1-1 | $1.03 \times 10^3 \pm 0.22 \times 10^3$ | $6.42 \times 10^{-3} \pm 0.32 \times 10^{-3}$ |
| Tbab1-4 | $2.42 \times 10^3 \pm 0.04 \times 10^3$ | $7.70 \times 10^{-3} \pm 0.21 \times 10^{-3}$ |
| Tbab1-7 | $4.34 \times 10^3 \pm 0.10 \times 10^3$ | $3.70 \times 10^{-3} \pm 0.05 \times 10^{-3}$ |
| Tbab1-8 | $2.66 \times 10^3 \pm 0.22 \times 10^3$ | $2.56 \times 10^{-3} \pm 0.06 \times 10^{-3}$ |
| Tbab1-9 | $1.12 \times 10^3 \pm 0.14 \times 10^3$ | $4.30 \times 10^{-3} \pm 0.11 \times 10^{-3}$ |
| Tbab2-4 | $3.14 \times 10^3 \pm 0.05 \times 10^3$ | $1.14 \times 10^{-3} \pm 0.08 \times 10^{-3}$ |

**Suppl. Table SIII. Size exclusion profile for Tbab proteins.**

|         | pI   | Molecular Weight (Dalton) | Apparent Molecular Weight (Dalton) | Aggregation State |
|---------|------|---------------------------|------------------------------------|-------------------|
| Tbab1-1 | 5.20 | 4125.6                    | 3700.2                             | 0.89              |
| Tbab1-2 | 5.20 | 4139.7                    | n.a.                               | n.a.              |
| Tbab1-3 | 6.36 | 4039.6                    | 4637.4                             | 1.15              |
| Tbab1-4 | 9.70 | 4093.7                    | 4153.7                             | 1.02              |
| Tbab1-5 | 5.11 | 4040.5                    | 8704.6                             | 2.15              |
| Tbab1-6 | 4.82 | 4139.7                    | 8860.0, 7924.7                     | 2.14, 1.91        |
| Tbab1-7 | 9.31 | 4169.8                    | 4752.0, 3774.3                     | 1.14, 0.91        |
| Tbab1-8 | 8.38 | 4081.7                    | 3855.6                             | 0.94              |
| Tbab1-9 | 6.36 | 4166.7                    | 4755.5, 3800.6                     | 1.14, 0.91        |
| Tbab2-4 | 9.82 | 4120.7                    | 4155.8                             | 1.01              |

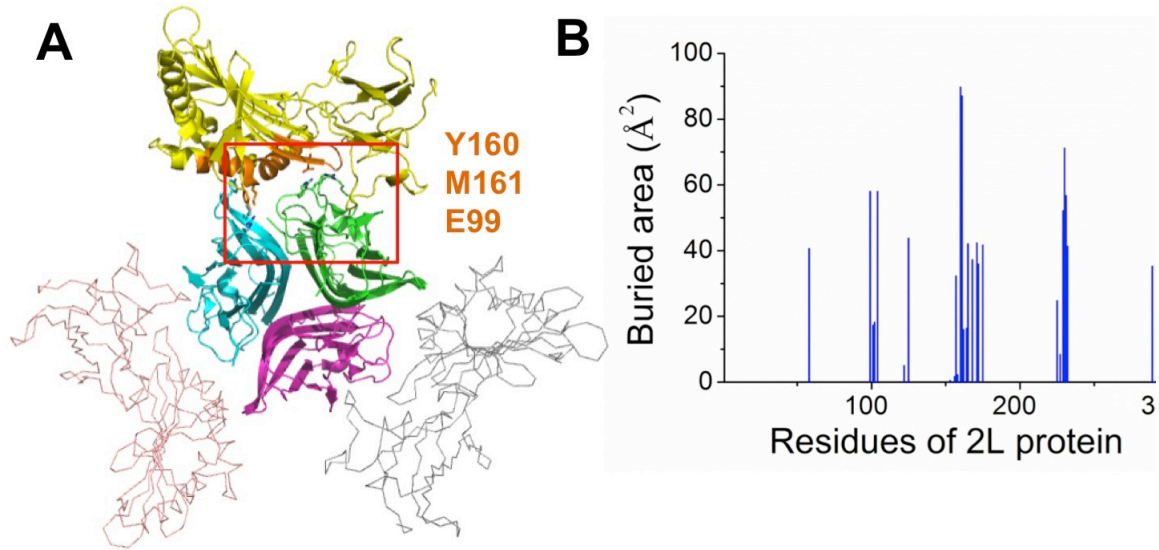

Suppl. Figure S1. Identification of key residues through calculation of buried area in TNF $\alpha$ -2L complex structure.

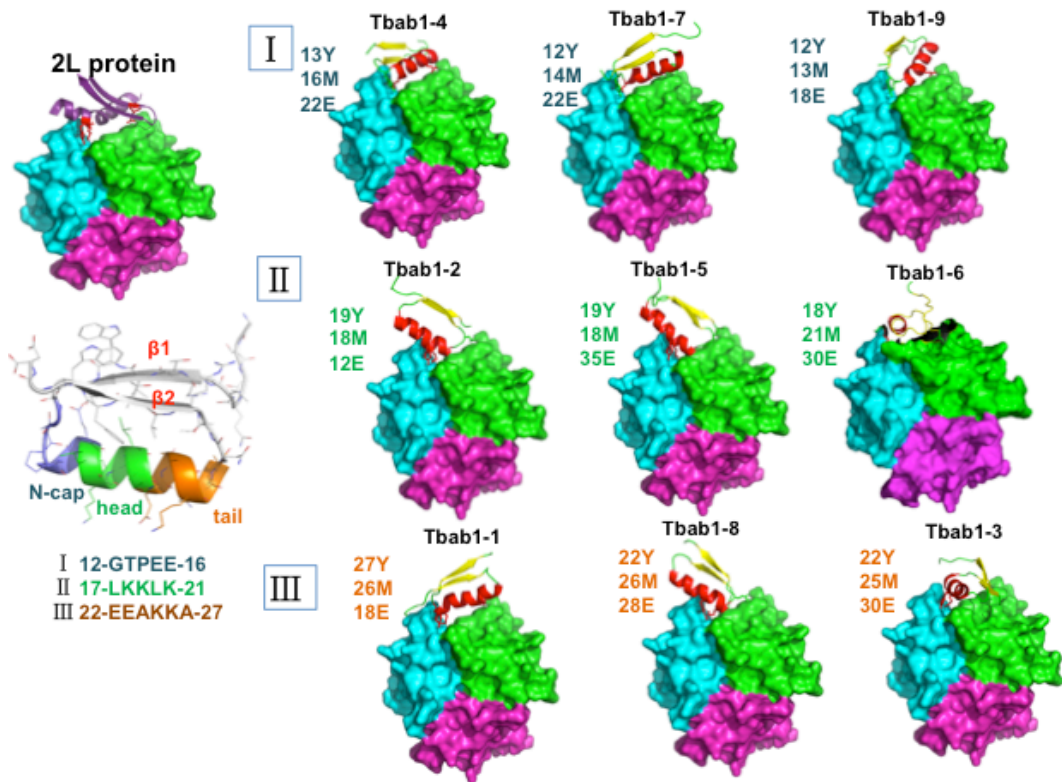

Suppl. Figure S2. Classification of Tbab1 proteins based on the binding orientations.

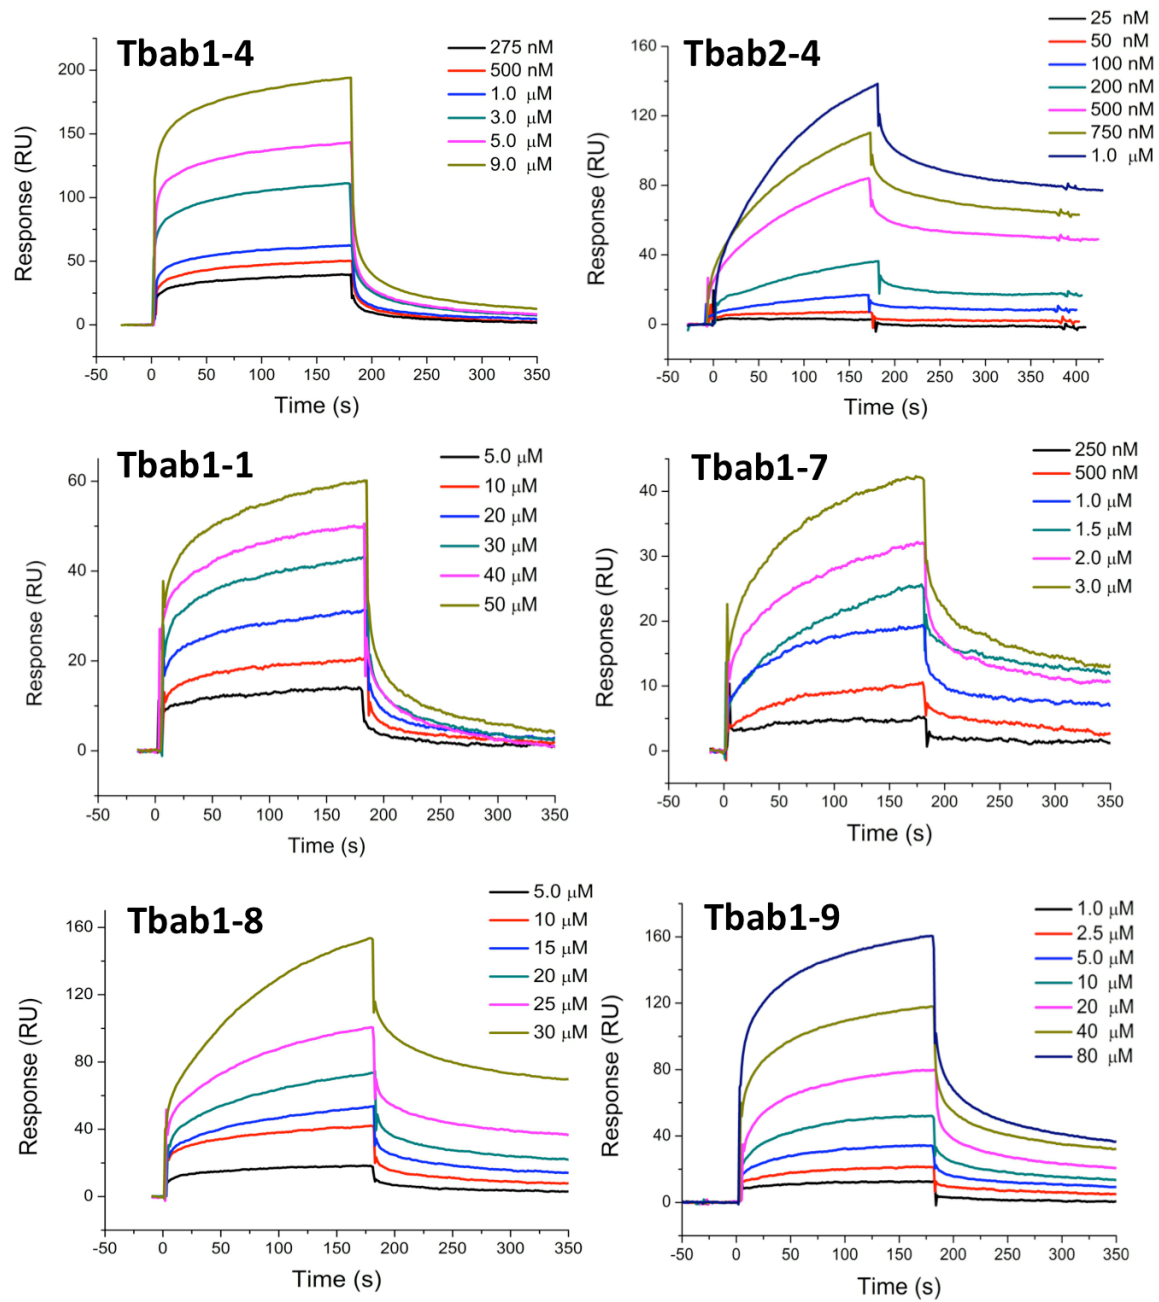

Suppl. Figure S3. SPR binding curves of Tbab proteins.

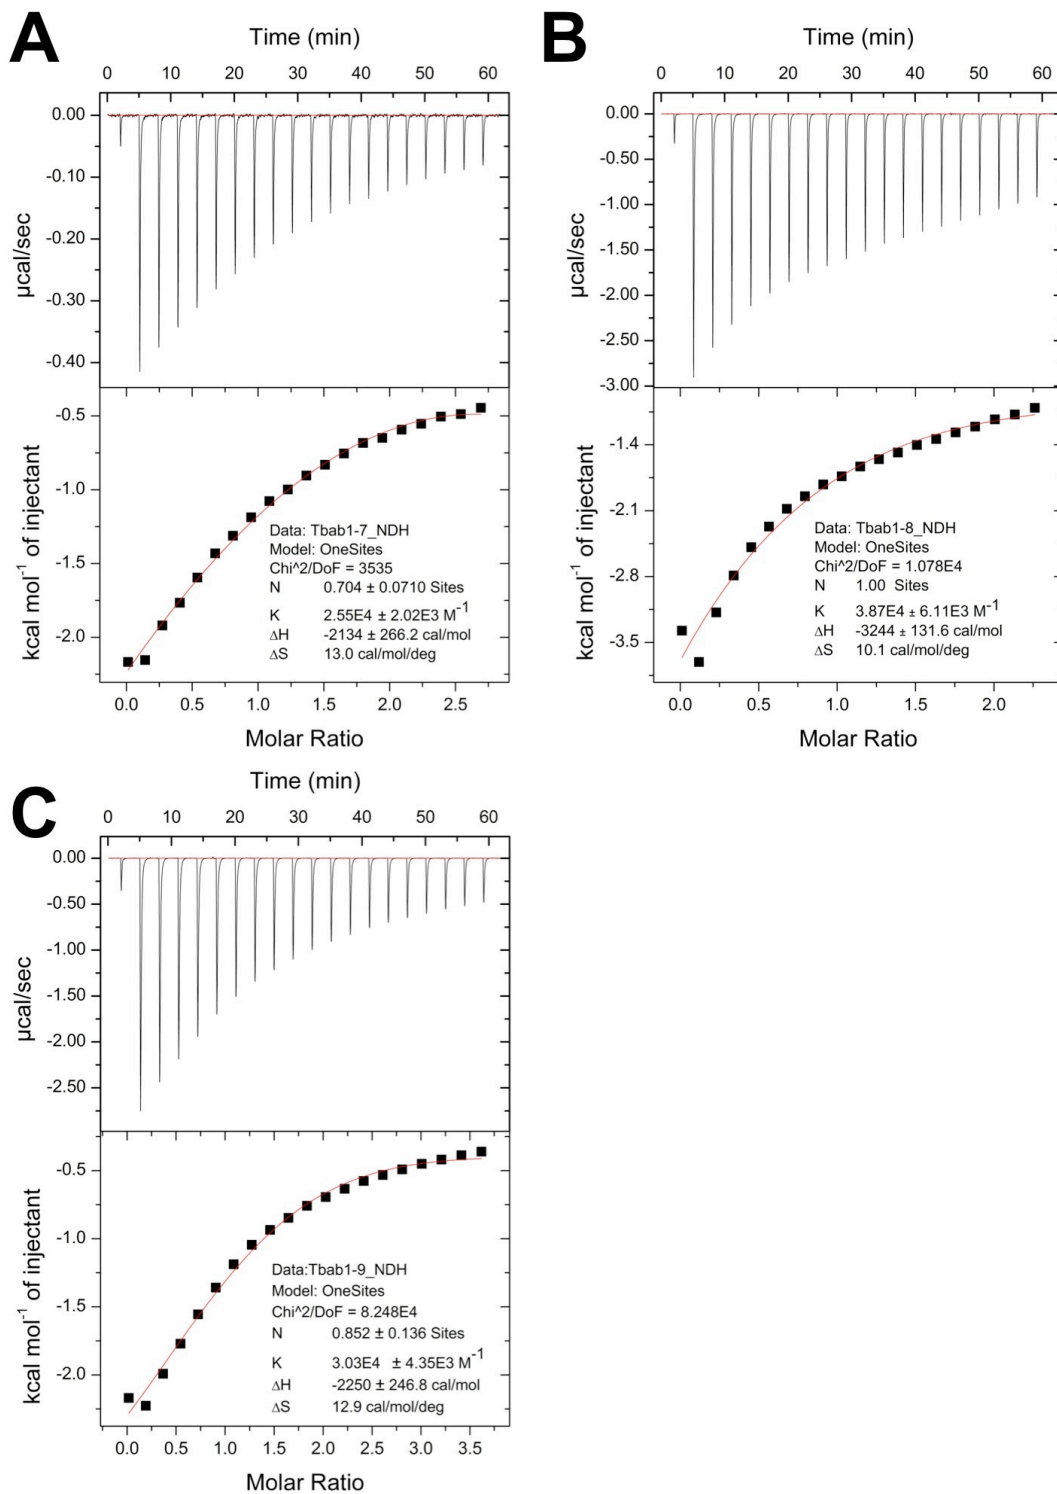

Suppl. Figure S4. Binding affinities of Tbab1-7, Tbab1-8 and Tbab1-9 to TNF $\alpha$  measured by ITC.

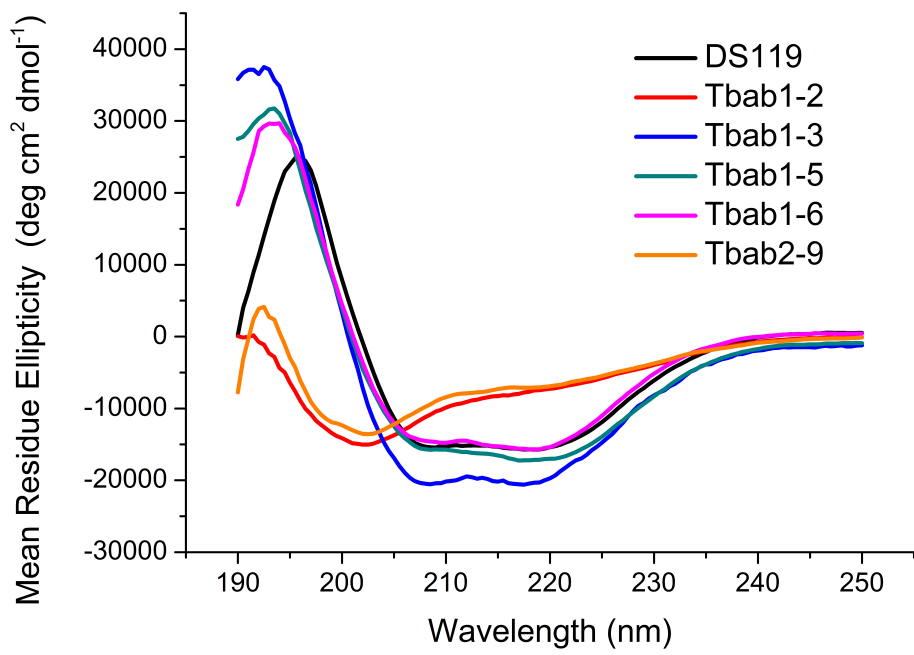

**Suppl. Figure S5. CD spectra of Tbab proteins that have no binding affinities to TNF $\alpha$ .** They have good secondary structures except for Tbab1-2 and Tbab2-9, which are unstructured proteins.

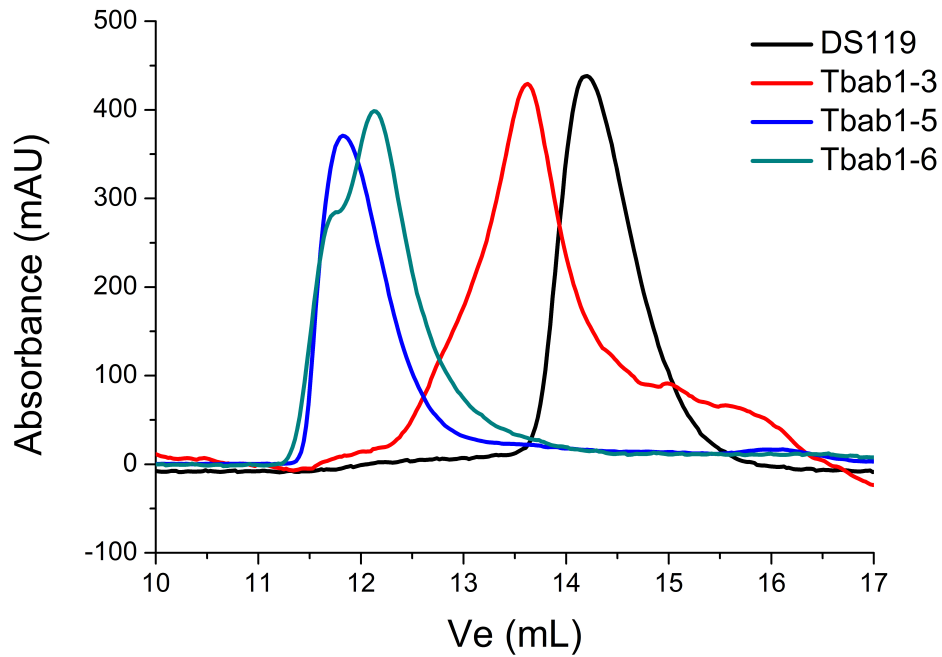

**Suppl. Figure S6. Size exclusion chromatography of Tbab proteins that have no binding affinities to TNF $\alpha$ .** Tbab1-3, 1-5 and 1-6 have good secondary structure (Figure S4) but they are dimers or exhibit exchange between monomers and dimers. Tbab1-2 and Tbab2-9 are unstructured proteins and not tested.

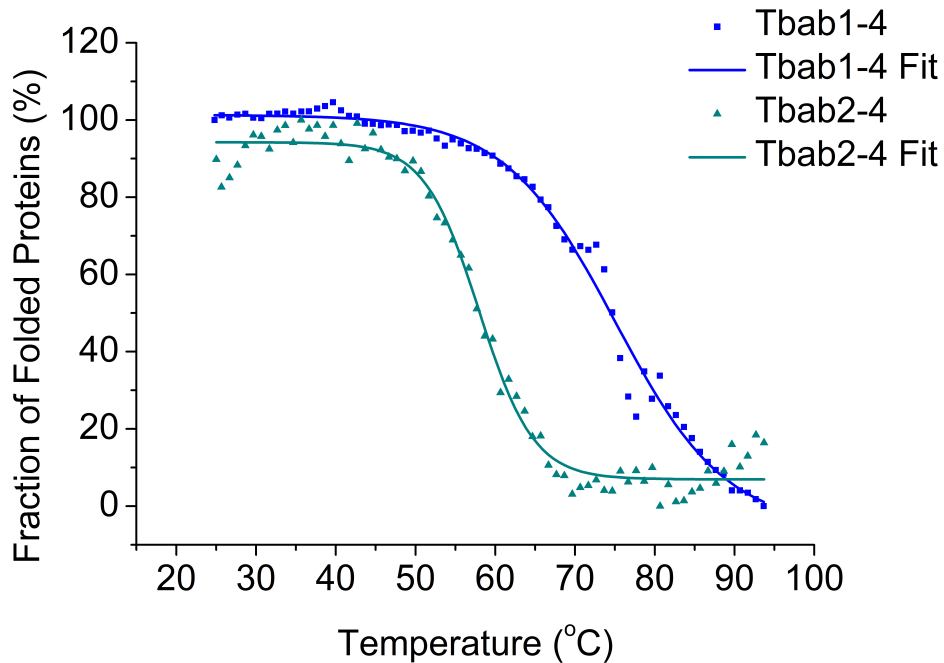

**Suppl. Figure S7. Thermal denaturation curves of Tbab1-4 and Tbab2-4.** The CD signal at 222 nm is monitored as the proteins unfold. The curves are fitted to a two-state protein folding model and the resulting melting temperatures for Tbab1-4 and Tbab2-4 are 85°C and 55°C, respectively.

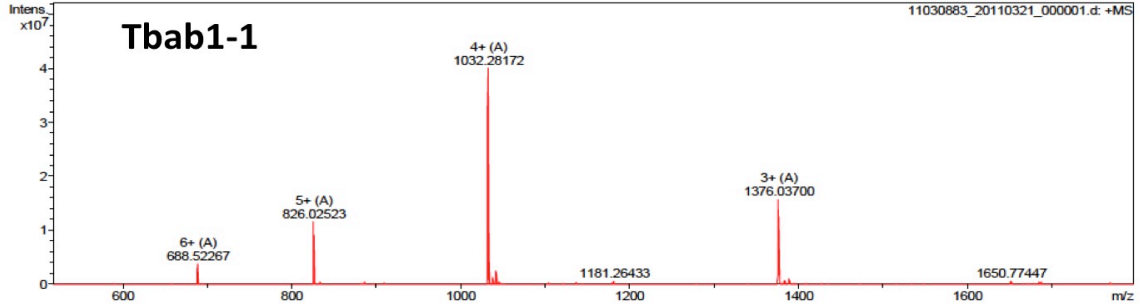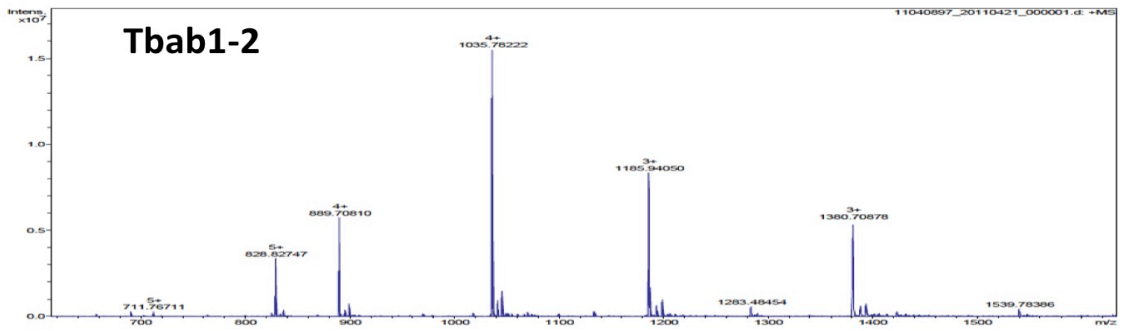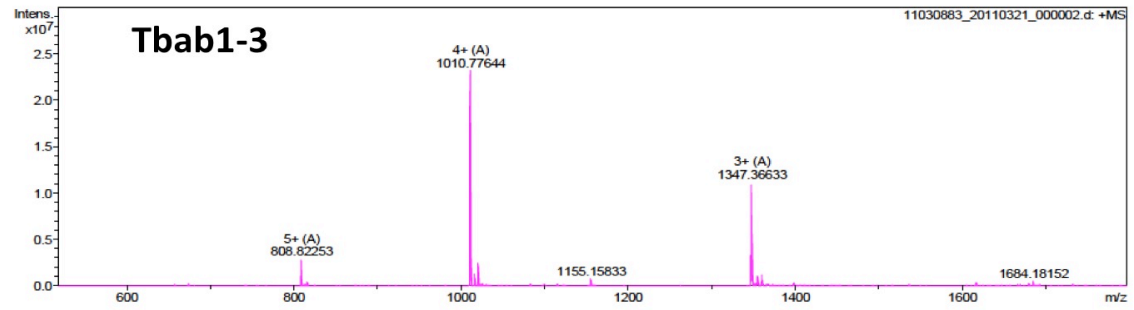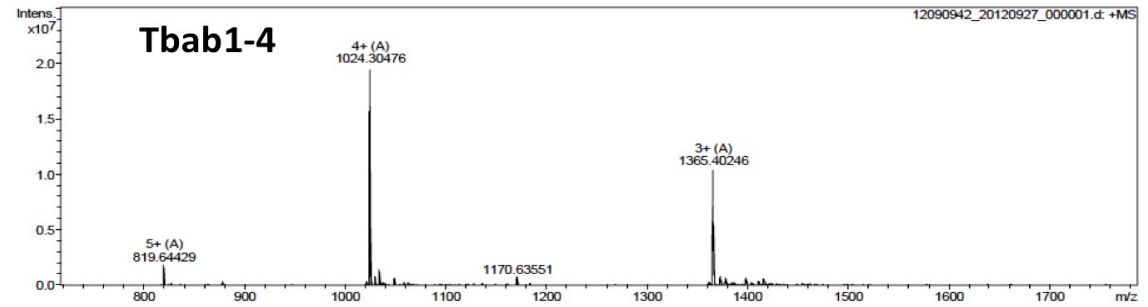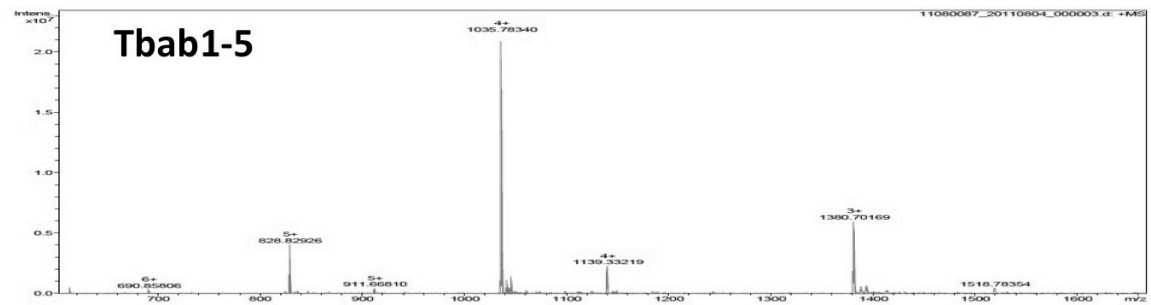



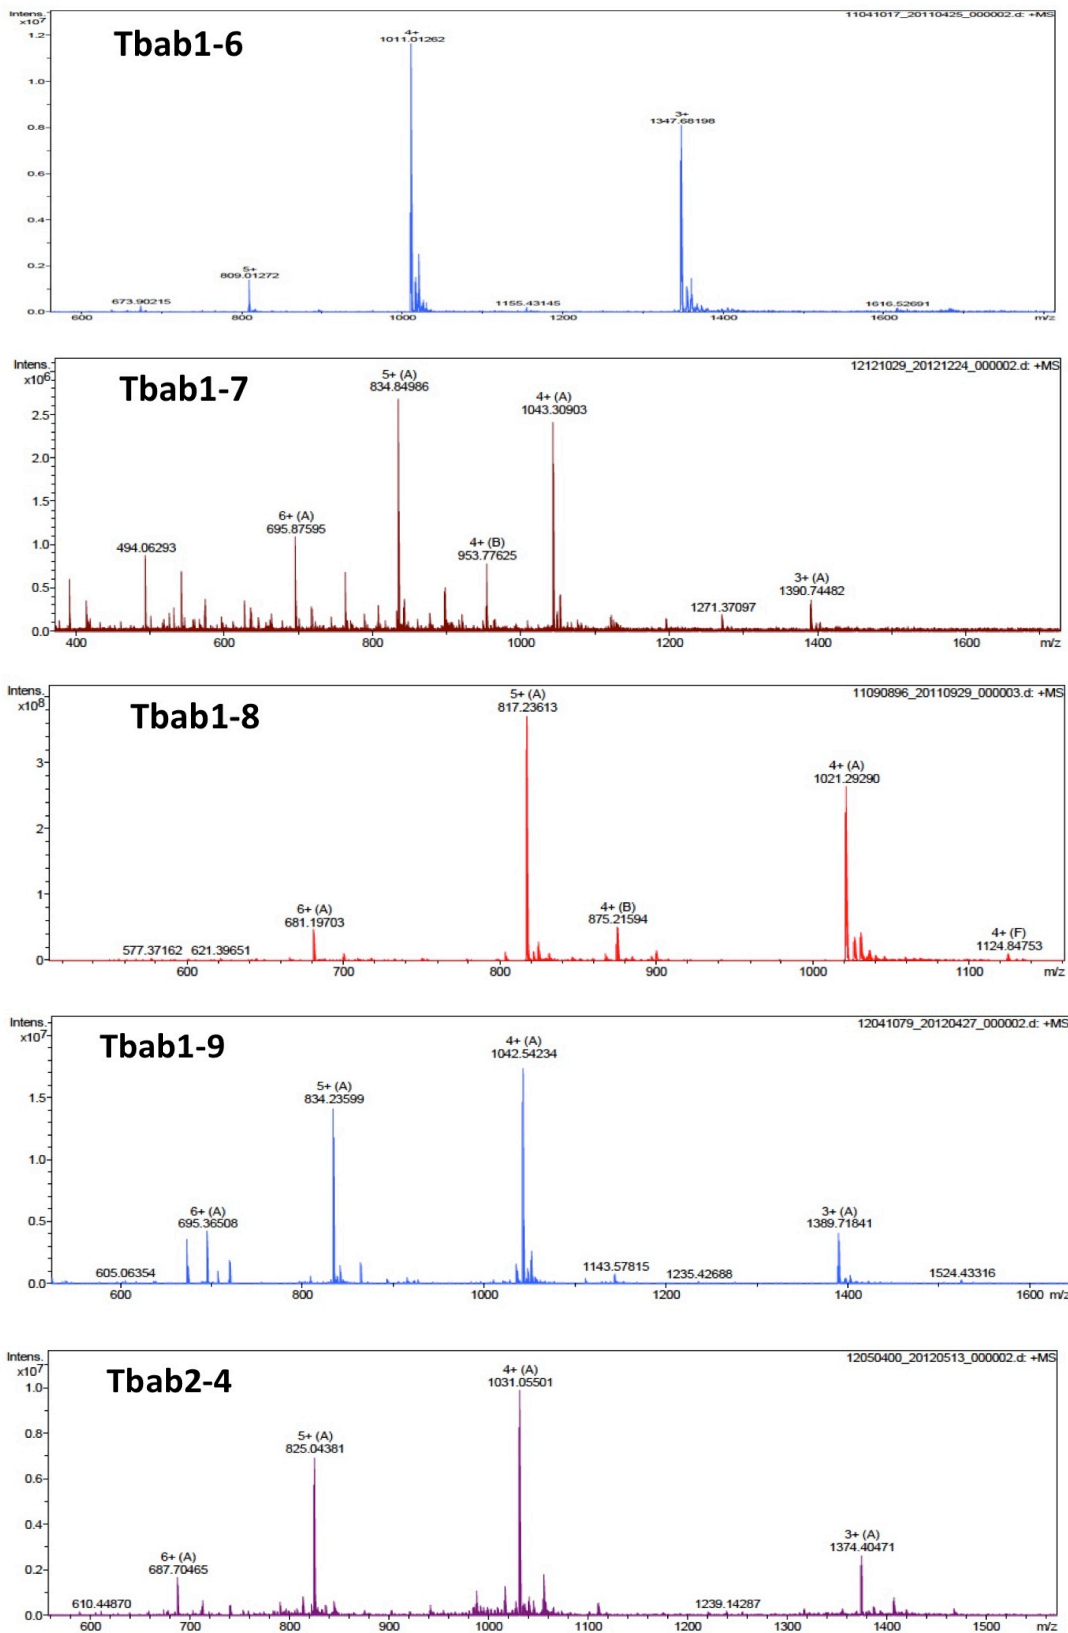

Suppl. Figure S8. Mass spectrometry images of Tbab proteins.
